# Supplementary material for: Ultrahigh-energy sodium ion capacitors enabled by the enhanced intercalation pseudocapacitance of self-standing Ti2Nb2O9/CNF anodes
Source: Royal Society of Chemistry journal article supplement (doi:10.1039/d1nr04241f), 2021-01-01
Supplement: d1nr04241f1.pdf [file d1nr04241f1.pdf]

Ultrahigh-energy sodium ion capacitors enabled by enhanced intercalation  
pseudocapacitance of self-standing  $\text{Ti}_2\text{Nb}_2\text{O}_9/\text{CNF}$  anodes

Liaona She<sup>1,2</sup>, Feng Zhang<sup>1</sup>, Congying Jia<sup>1</sup>, Liping Kang<sup>1</sup>, Qi Li<sup>1</sup>, Xuexia He<sup>1</sup>,  
Jie Sun<sup>1</sup>, Zhibin Lei<sup>1</sup>, Zong-Huai Liu<sup>1\*</sup>

<sup>1</sup> Key Laboratory of Applied Surface and Colloid Chemistry (Shaanxi Normal University), Ministry of Education, Xi'an, 710062, P. R. China; Shaanxi Key Laboratory for Advanced Energy Devices; Xi'an, 710119, P. R. China; School of Materials Science and Engineering, Shaanxi Normal University, Xi'an, 710119, P. R. China.

<sup>2</sup> Institute of Science and Technology for New Energy, Xi'an Technological University, Xi'an, 710021, P. R. China.

\*Correspondence should be addressed to:

Prof. Zong-Huai Liu

School of Materials Science and Engineering, Shaanxi Normal University

Xi'an, Shaanxi, 710062, P. R. China

Tel: ++86-29-81530706

Fax: ++86-29-81530702

E-mail: [zhliu@snnu.edu.cn](mailto:zhliu@snnu.edu.cn)

ORCID iD : 0000-0003-4263-0628

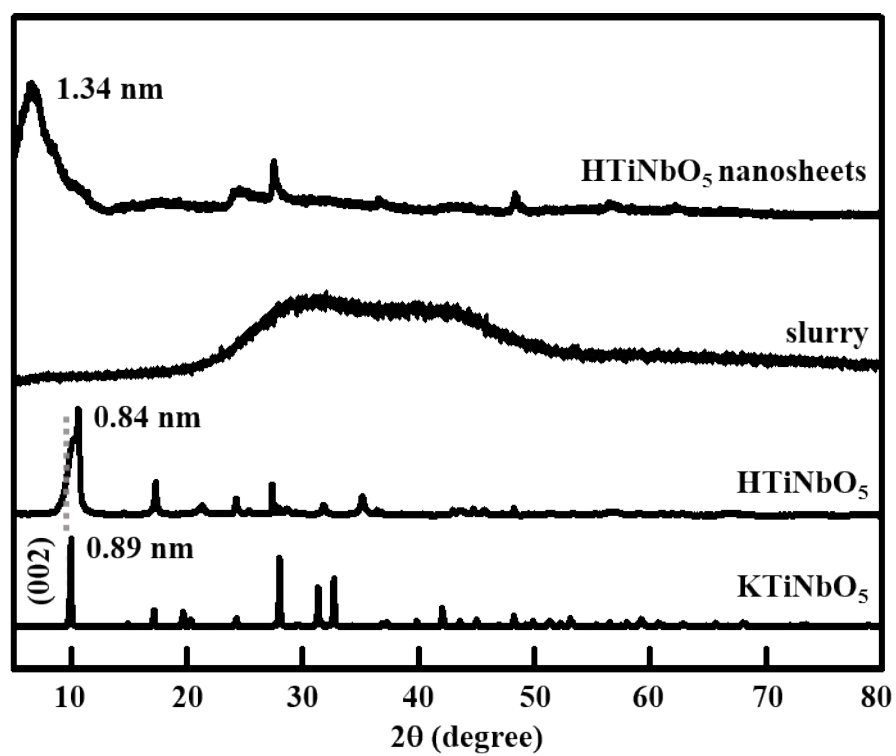

**Fig. S1.** XRD patterns of bulk KTiNbO<sub>5</sub>, bulk HTiNbO<sub>5</sub>, delaminated HTiNbO<sub>5</sub> slurry, and HTiNbO<sub>5</sub> nanosheets.

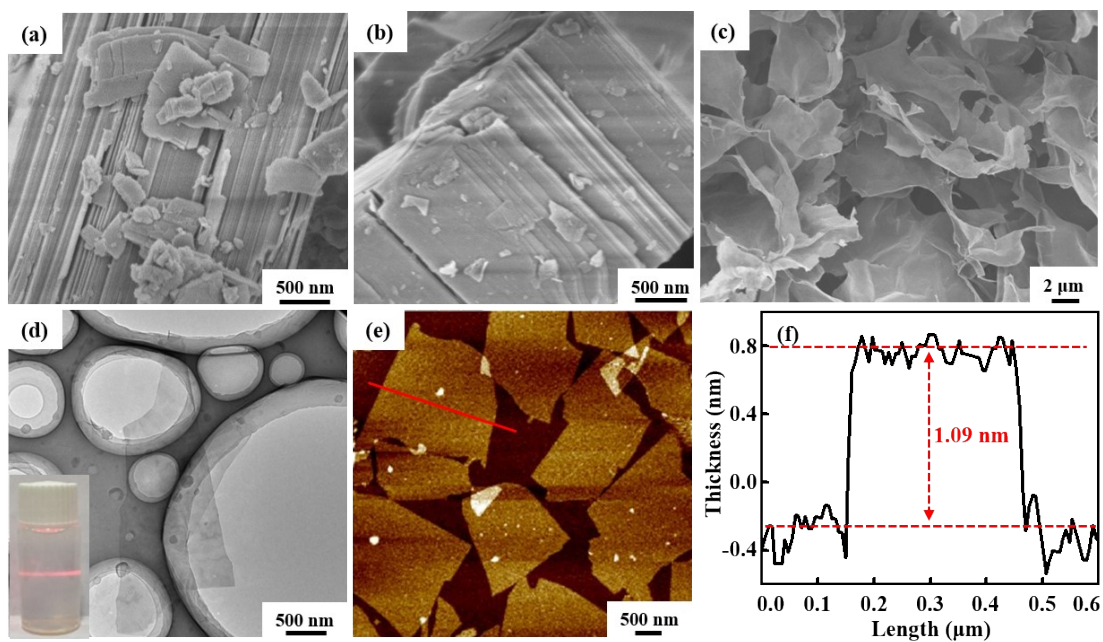

**Fig. S2.** FE-SEM images of bulk KTiNbO<sub>5</sub> (a), bulk HTiNbO<sub>5</sub> (b), HTiNbO<sub>5</sub> nanosheets (c), TEM image (inserted for the delaminated HTiNbO<sub>5</sub> nanosheets suspension) (d), AFM image (e), and the thickness profile (f) of the delaminated HTiNbO<sub>5</sub> nanosheets.

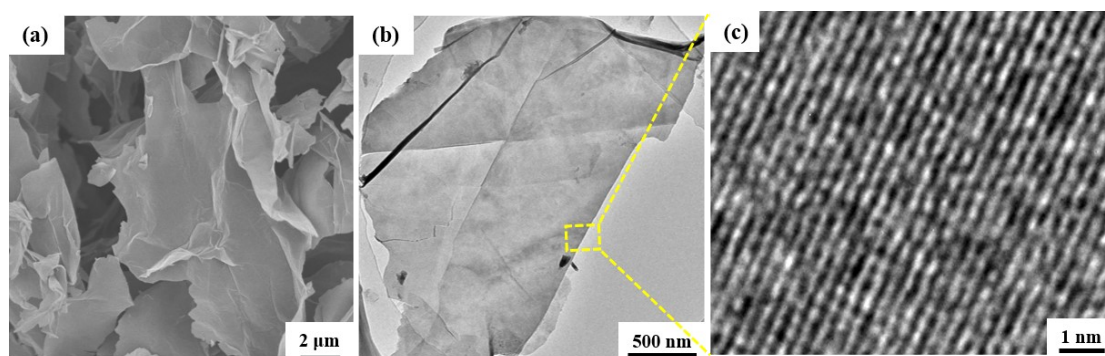

**Fig. S3.** SEM (a), TEM (b), and HRTEM (c) images of  $\text{Ti}_2\text{Nb}_2\text{O}_9$ .

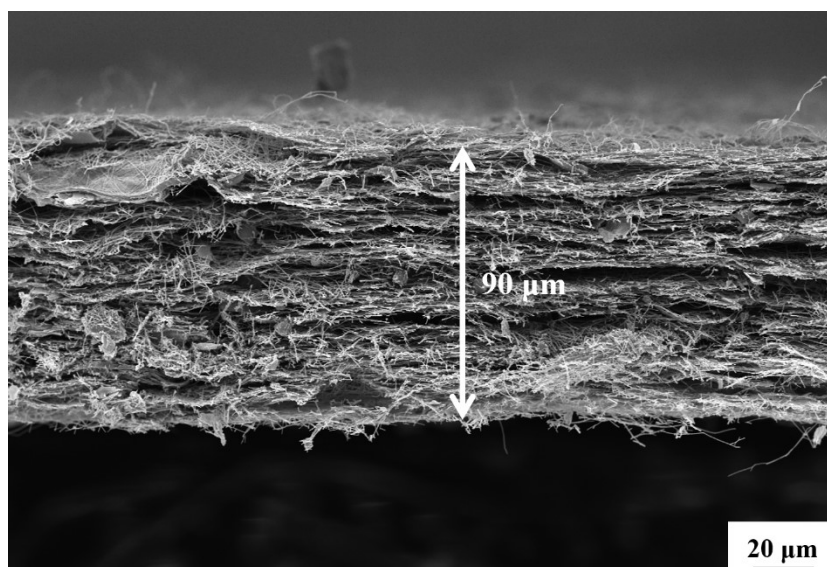

**Fig. S4.** Cross-sectional morphology of Ti<sub>2</sub>Nb<sub>2</sub>O<sub>9</sub>/CNF film.

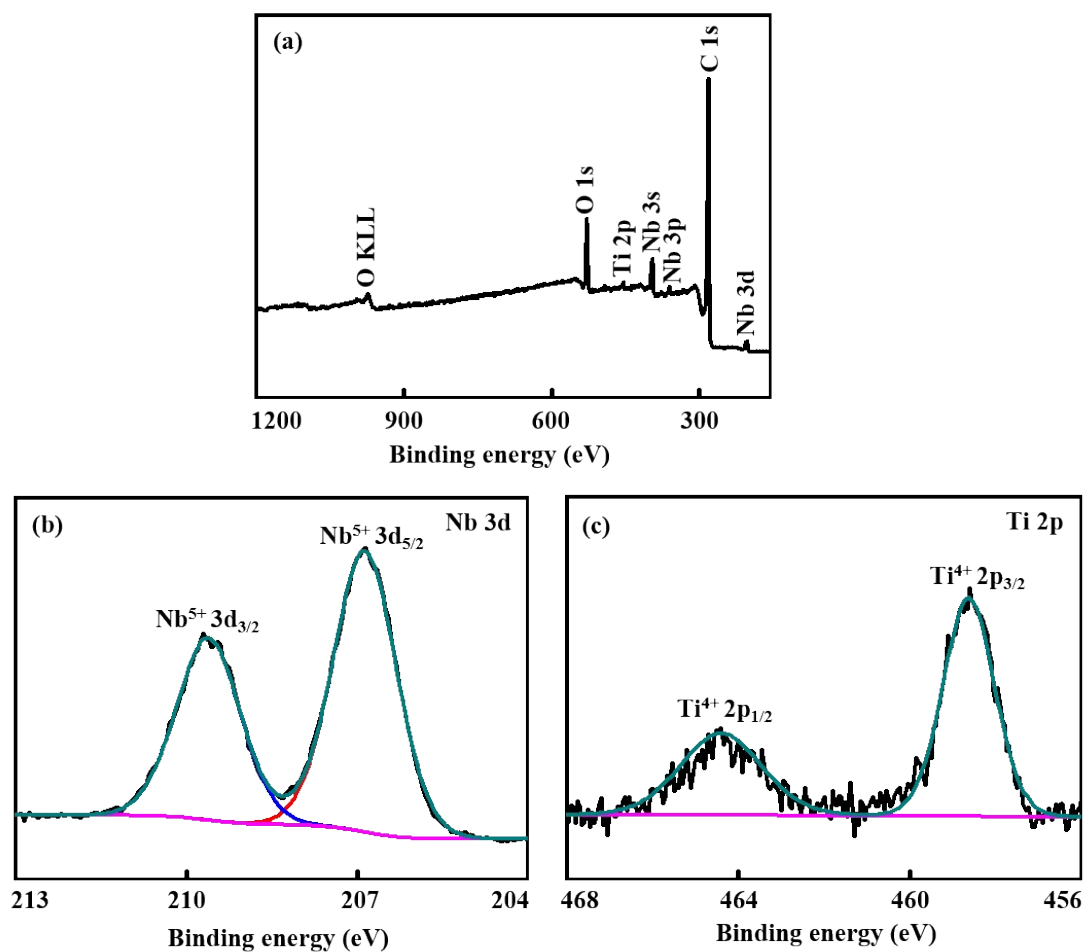

**Fig. S5.** XPS spectra of  $\text{Ti}_2\text{Nb}_2\text{O}_9/\text{CNF}$  film: survey spectrum (a), high-resolution Nb 3d (b), and Ti 2p (c).

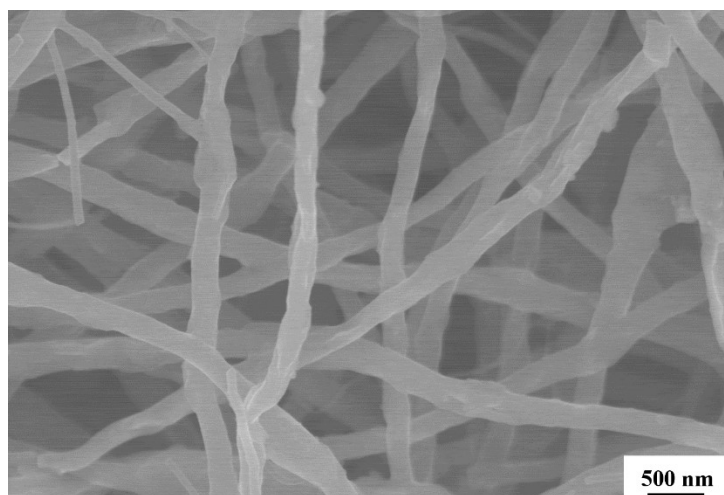

**Fig. S6.** SEM image of  $\text{Ti}_2\text{Nb}_2\text{O}_9/\text{CNF}$  electrode after 2000 cycles at  $1 \text{ A g}^{-1}$ .

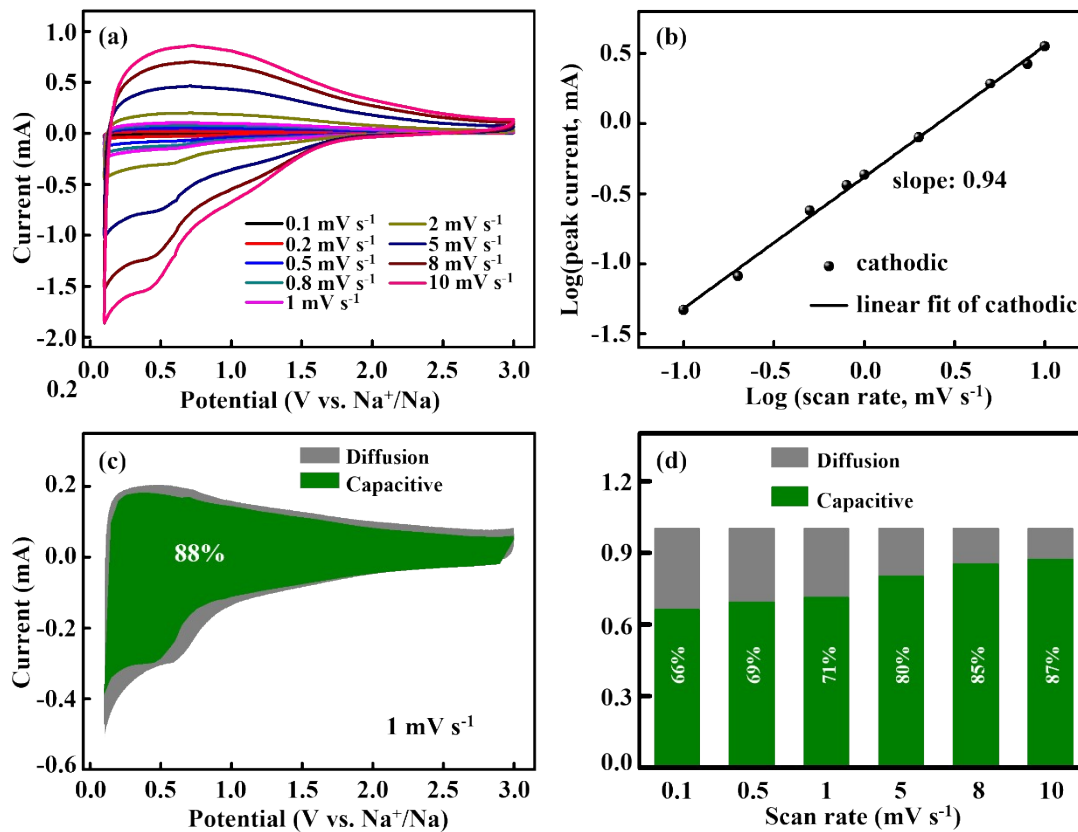

**Fig. S7.** CV curves at different scan rates (a) and b-value calculated through cathodic scan and peak currents (b) of  $\text{Ti}_2\text{Nb}_2\text{O}_9$  electrode, the capacitive and diffusive contribution to the current density at 1  $\text{mV s}^{-1}$  of  $\text{Ti}_2\text{Nb}_2\text{O}_9/\text{CNF}$  electrode (c), and capacitive-controlled contribution at different scan rates (d) of  $\text{Ti}_2\text{Nb}_2\text{O}_9$  electrode.

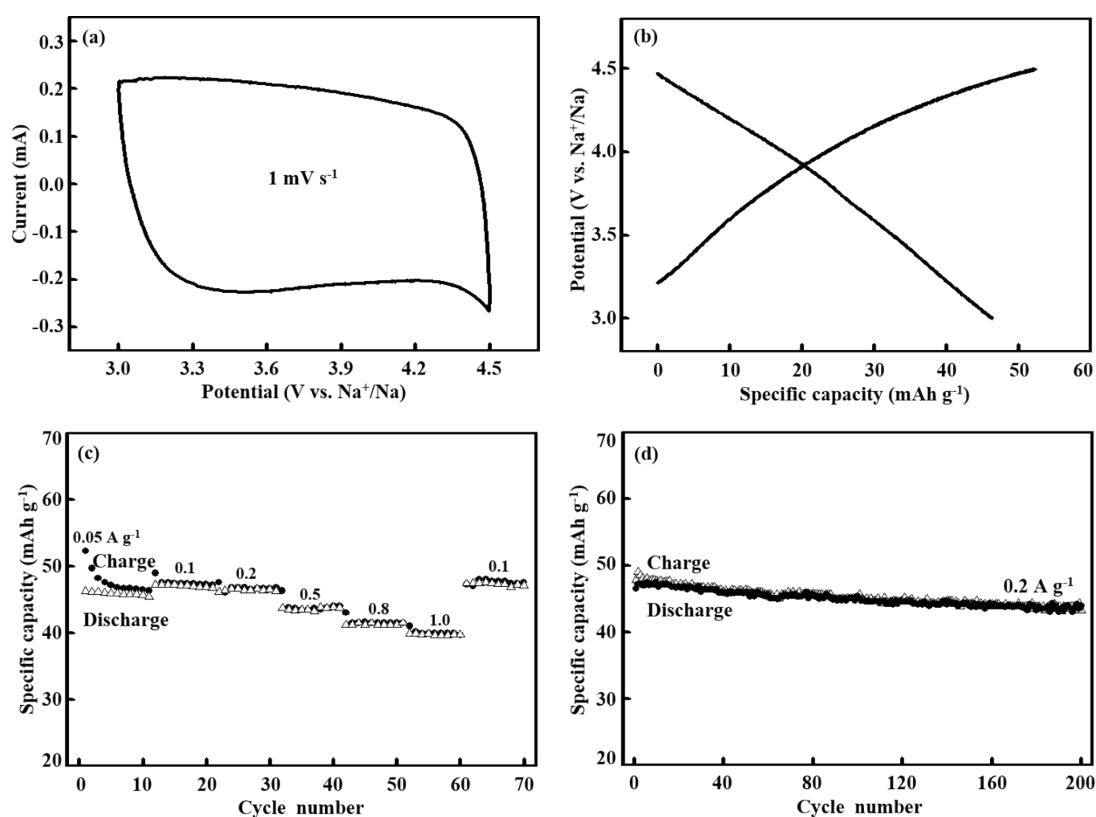

**Fig. S8.** CV curve at  $1 \text{ mV s}^{-1}$  (a), galvanostatic charge and discharge curves at  $0.05 \text{ A g}^{-1}$  between 3.0-4.5 V (b), rate capability at different current densities (c), and cycling stability at  $0.2 \text{ A g}^{-1}$  (d) of AC electrode.

The quasi-rectangular CV curve at  $1 \text{ mV s}^{-1}$  and linear GCD curves at  $0.05 \text{ A g}^{-1}$  indicate electric double-layer capacitive behavior of AC electrode. Its specific capacity at  $0.05 \text{ A g}^{-1}$  is estimated to be  $46 \text{ mAh g}^{-1}$ , with outstanding rate capability and good cycling stability at  $0.2 \text{ A g}^{-1}$  ( $\approx 95\%$  after 200 cycles).

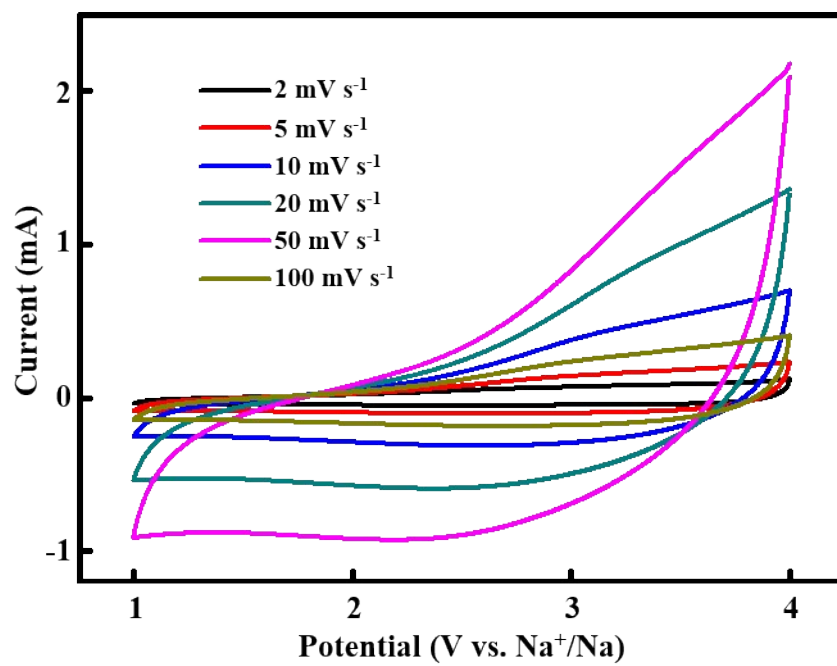

**Fig. S9.** CV curves at different scan rates from 2 to 100  $\text{mV s}^{-1}$  of  $\text{Ti}_2\text{Nb}_2\text{O}_9/\text{CNF}/\text{AC}$  SIC.
